# Supplementary material for: Calcination-free production of calcium hydroxide at sub-boiling temperatures
Source: Royal Society of Chemistry journal article supplement (doi:10.1039/d0ra08449b), 2021-01-01
Supplement: d0ra08449b1.pdf [file d0ra08449b1.pdf]

# Calcination-free production of calcium hydroxide at sub-boiling temperatures

Sara Vallejo Castaño (\*,†), Erika Callagon La Plante (\*,‡,§), Sho Shimoda (\*), Bu Wang (\*\*), Narayanan Neithalath (††), Gaurav Sant (\*,‡,‡‡,§§,&), Laurent Pilon (†,‡,&)

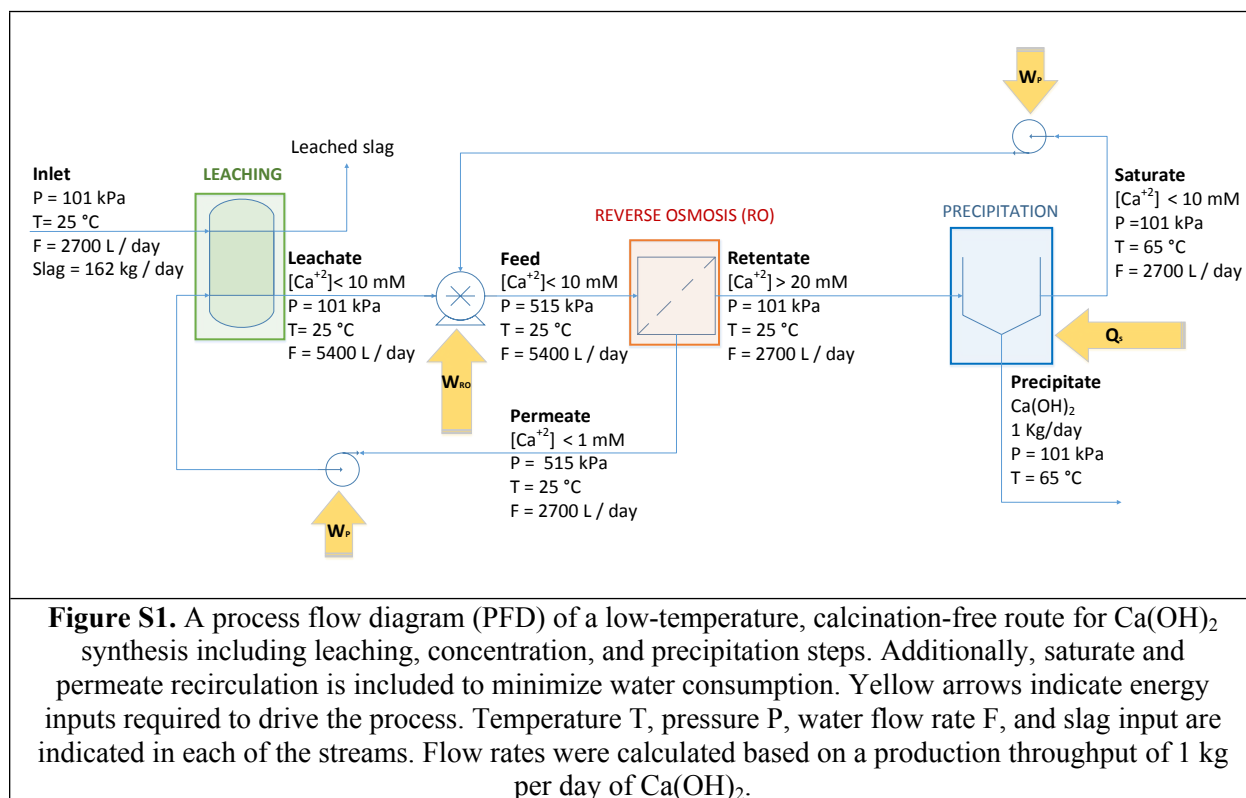

**Figure S1.** A process flow diagram (PFD) of a low-temperature, calcination-free route for Ca(OH)<sub>2</sub> synthesis including leaching, concentration, and precipitation steps. Additionally, saturate and permeate recirculation is included to minimize water consumption. Yellow arrows indicate energy inputs required to drive the process. Temperature T, pressure P, water flow rate F, and slag input are indicated in each of the streams. Flow rates were calculated based on a production throughput of 1 kg per day of Ca(OH)<sub>2</sub>.

\* Laboratory for the Chemistry of Construction Materials (LC<sup>2</sup>), Department of Civil and Environmental Engineering, University of California, Los Angeles, CA 90095, USA

† Department of Mechanical and Aerospace Engineering, University of California, Los Angeles, CA 90095, USA

‡ Institute for Carbon Management, University of California, Los Angeles, CA 90095, USA

§ Department of Materials Science and Engineering, University of Texas, Arlington, TX 76019, USA

\*\* Department of Civil and Environmental Engineering, University of Wisconsin, Madison, WI 53706, USA

†† School of Sustainable Engineering and the Built Environment, Arizona State University, Tempe, AZ 85287, USA

‡‡ Department of Materials Science and Engineering, University of California, Los Angeles, CA 90095, USA

§§ California Nanosystems Institute, University of California, Los Angeles, CA 90095, USA

\*\*\* Corresponding authors: G. Sant [Phone: (310) 206-3084, Email: [gsant@ucla.edu](mailto:gsant@ucla.edu)]  
L. Pilon [Phone: (310) 206-5598, Email: [pilon@seas.ucla.edu](mailto:pilon@seas.ucla.edu)]

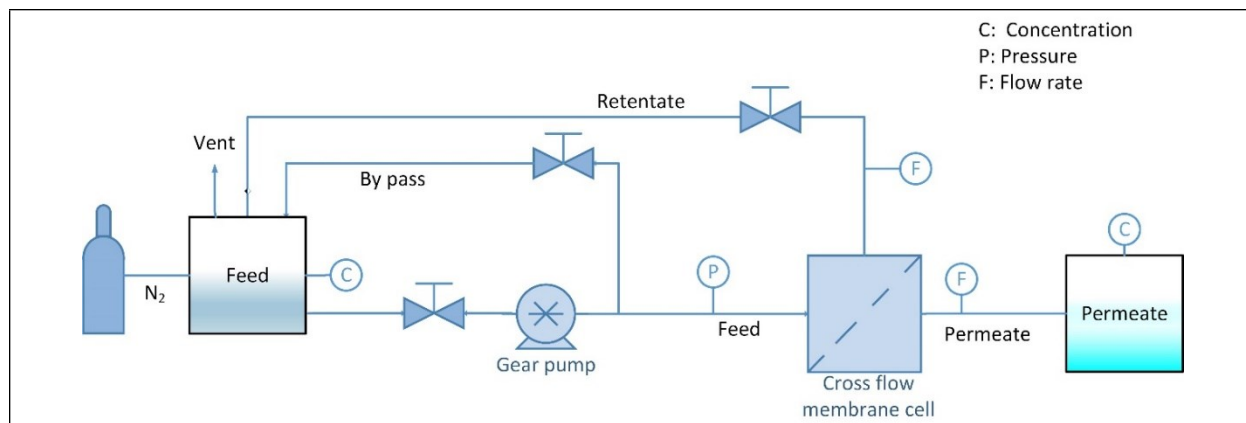

**Figure S2.** A schematic of the RO concentration setup showing cross flow membrane cell, feed, and permeate tanks, gear pump and streams configuration (retentate, permeate, bypass, and nitrogen lines). The circled C, P, and F indicate the location of concentration, pressure, and flow rate measurement sensors, respectively.

9  
10

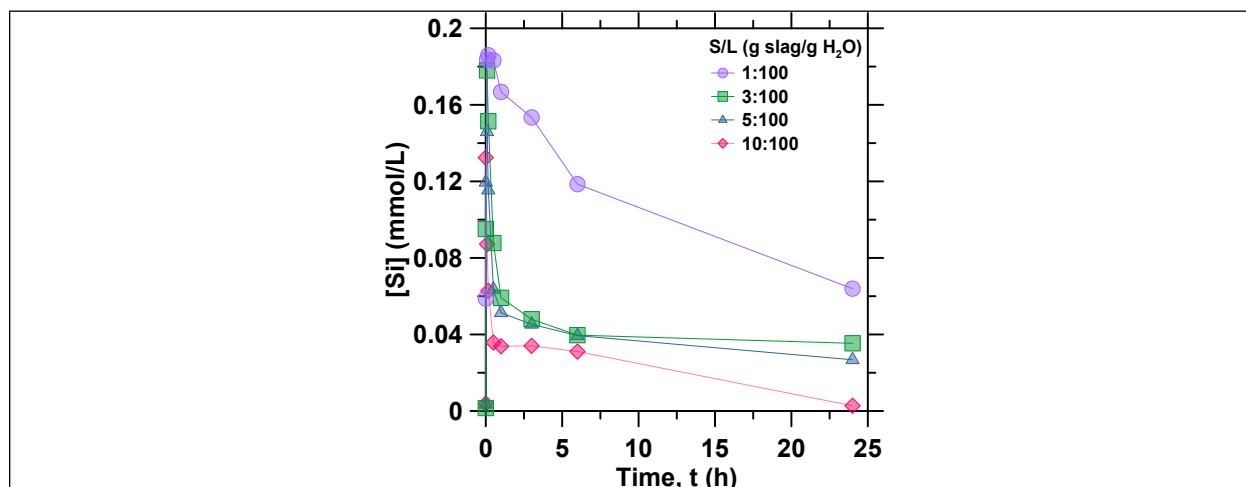

**Figure S3.** The silicon concentration as a function of time in stirred conditions following leaching of a BOF-slag.

11  
12

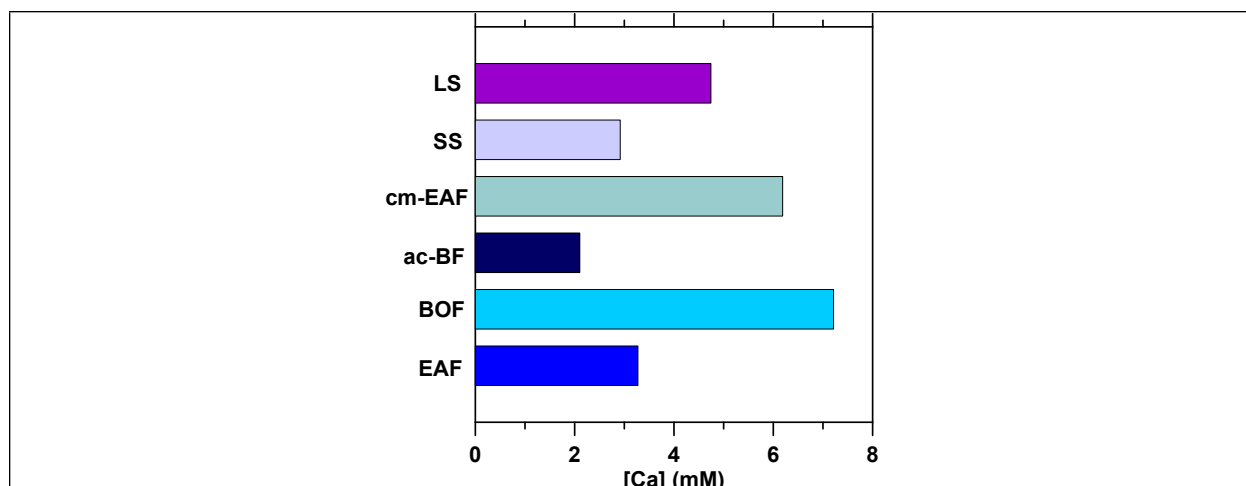

**Figure S4.** The Ca-concentration after 6 hours during leaching at 25 °C under stirred conditions ( $s/l = 0.01$ , particle size: 53  $\mu\text{m}$ ) for six different slag types including: ladle slag (LS), stainless steel slag (SS), co-mingled electric arc furnace steel slag (cm-EAF), air-cooled blast furnace slag (ac-BF), basic oxygen furnace slag (BOF), and electric arc furnace steel slag (EAF), respectively.

13

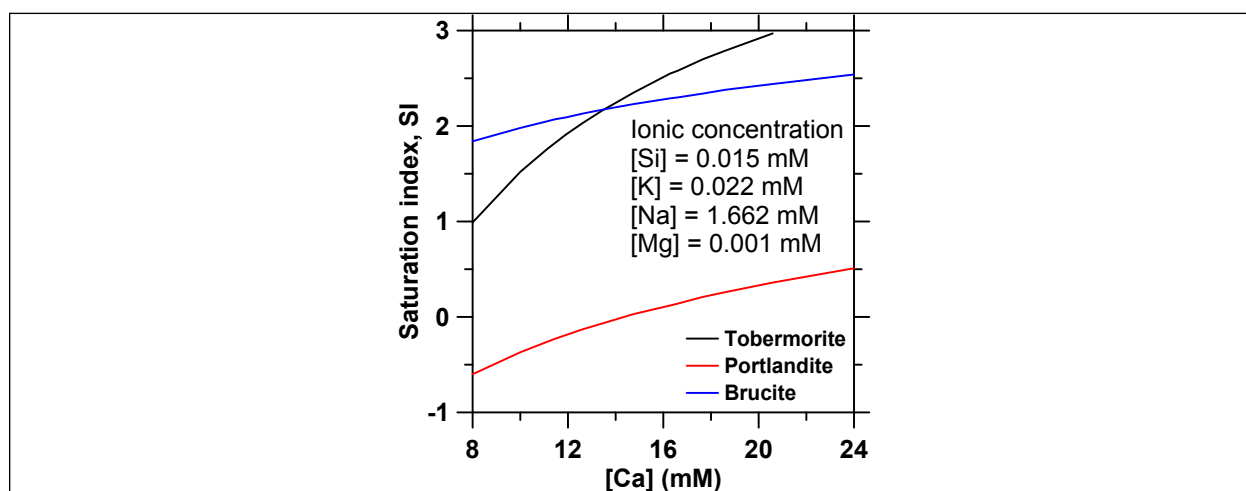

**Figure S5.** The saturation index of 11Å Tobermorite, Portlandite ( $\text{Ca}(\text{OH})_2$ ) and Brucite ( $\text{Mg}(\text{OH})_2$ ) as a function of  $[\text{Ca}]$  and in the presence of other ionic species (see legend) as calculated using PHREEQC. The concentration of the other dissolved elements in solution was measured through ICP-OES for the 10 mM slag leachate solution after 6 h of leaching.

14

15 **Ionic conductivity calculations**

16 The parameters to solve Onsager's equation can be calculated as follows: The ionic conductivity  
 17 of each species at infinite dilution  $\lambda_i^o$  is proportional to temperature in the range of our  
 18 experiment. Figure S6 shows the reference value of  $\lambda_i^o$  at each temperature.<sup>91</sup> Using the linear  
 19 temperature dependence,  $\lambda_i^o$  is calculated as a function of temperature T.

20

$$\lambda_{Ca}^o(T) = 1.941T + 3.087 \quad (S1)$$

$$\lambda_{OH}^o(T) = 3.061T + 126.2 \quad (S2)$$

21

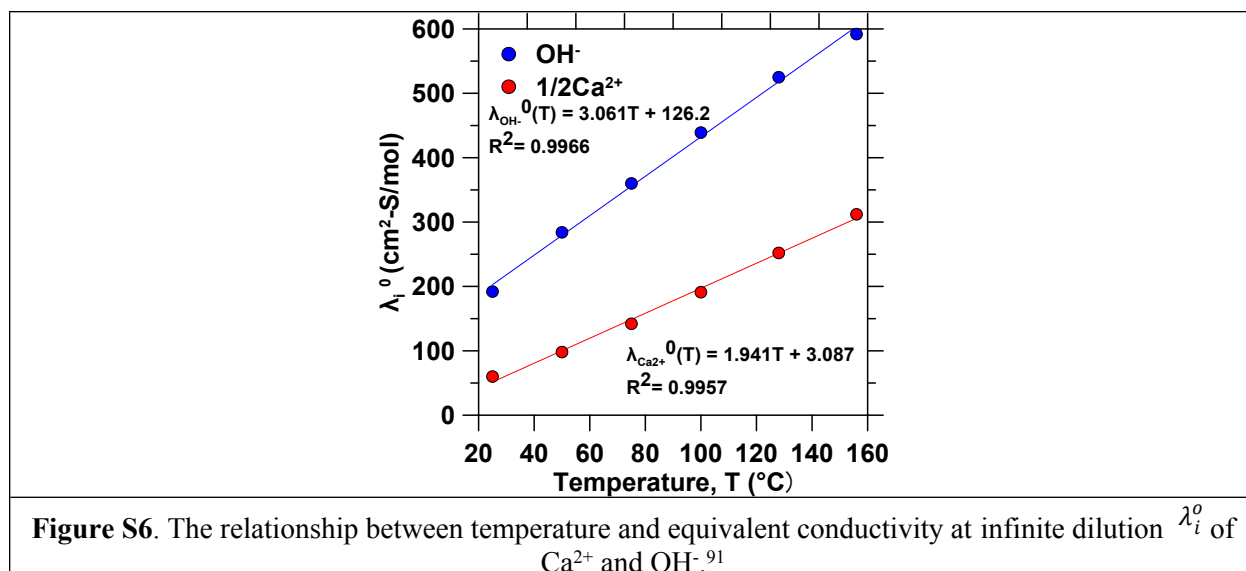

22

23 Moreover,  $S$  is calculated as

$$S_{Ca}(T) = \frac{1970 \times 10^6}{\{\varepsilon_r(T) \times T\}^{3/2}} \left( \frac{q(T)^*}{1 + \sqrt{q(T)^*}} \right) \times |z_{Ca} z_{OH}| \lambda_{Ca}^0(T) + \frac{28.98 \times |z_{Ca}|}{\eta(T) \times \{\varepsilon_r(T) \times T\}^{1/2}} \quad (\text{S3})$$

$$S_{OH}(T) = \frac{1970 \times 10^6}{\{\varepsilon_r(T) \times T\}^{3/2}} \left( \frac{q(T)^*}{1 + \sqrt{q(T)^*}} \right) \times |z_{Ca} z_{OH}| \lambda_{OH}^0(T) + \frac{28.98 \times |z_{OH}|}{\eta(T) \times \{\varepsilon_r(T) \times T\}^{1/2}} \quad (\text{S4})$$

24

25 where,  $T$  represents temperature,  $\eta$  the viscosity,  $\varepsilon_r$  the relative permittivity of the medium, and  $z_i$   
26 the valence of each ionic species. The parameter  $q$  can be calculated as

$$q(T)^* = \frac{2}{3} \times \frac{(\lambda_{Ca}^0(T) + \lambda_{OH}^0(T))}{(\lambda_{Ca}^0(T) + 2\lambda_{OH}^0(T))} \quad (\text{S5})$$

27

28 Moreover, the relative permittivity  $\varepsilon_r$  and the viscosity  $\eta$  of the solvent are dependent on  
29 temperature  $T$  (in °C). Figure S7 shows the reference value of  $\varepsilon_r$  at each temperature.<sup>92</sup>

30

31 The value of  $\varepsilon_r$  can be determined by the linear regression expressed as Equation S6 and  $\eta$  is  
32 calculated by Equation S7.<sup>93</sup>

33

$$\varepsilon_r(T) = -0.3083T + 85.70 \quad (\text{S6})$$

$$\eta(T) = 2.414 \times 10^{-5} \times 10^{247.8/(T-140)} \quad (\text{S7})$$

34

35 Finally, the ionic concentration  $\Gamma$  can be calculated according to

$$\Gamma([Ca]_{aq}) = [Ca]_{aq} z_{Ca}^2 + [OH^-]_{aq} z_{OH}^2 \quad (\text{S8})$$

36

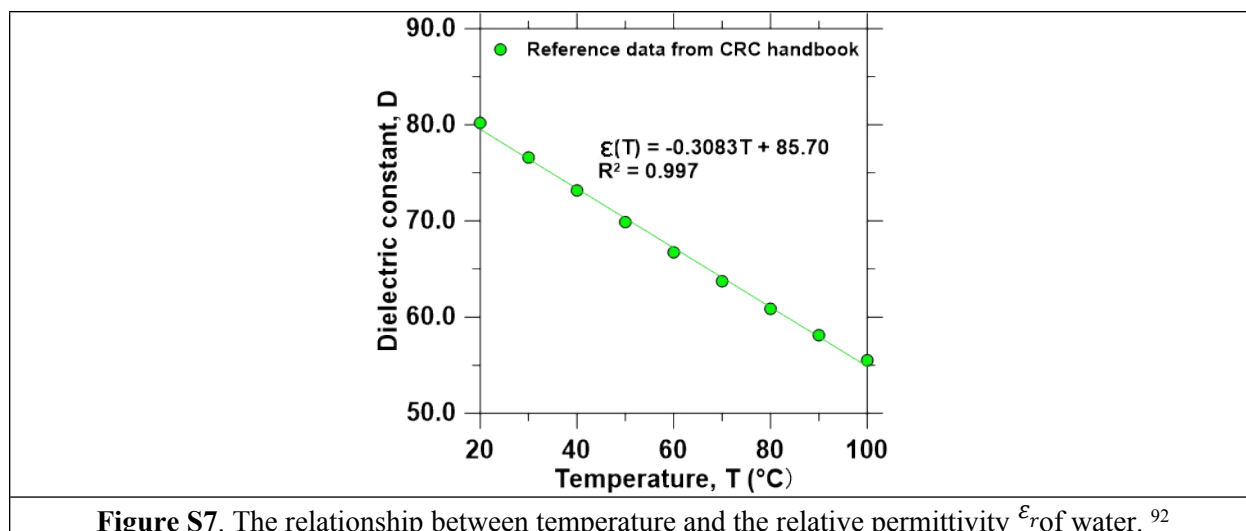

37

38 **Determination of the calcium concentration from the conductivity of the solution**

39 To determine aqueous calcium concentration  $[Ca]_{aq}$  from the measured conductivity, it is  
 40 necessary to describe the relationship between the hydroxide concentration  $[OH^-]_{aq}$ ,  $[Ca]_{aq}$  and  
 41 temperature because the concentration of hydroxide  $[OH^-]_{aq}$  dominantly affects the conductivity.  
 42 Figure S8 shows the theoretical variation of  $[OH^-]_{aq}$  as a function of temperature for different  
 43 calcium concentrations  $[Ca]_{aq}$  calculated using PHREEQC. It indicates that  $[OH^-]_{aq}$  decreased  
 44 linearly with temperature.

45

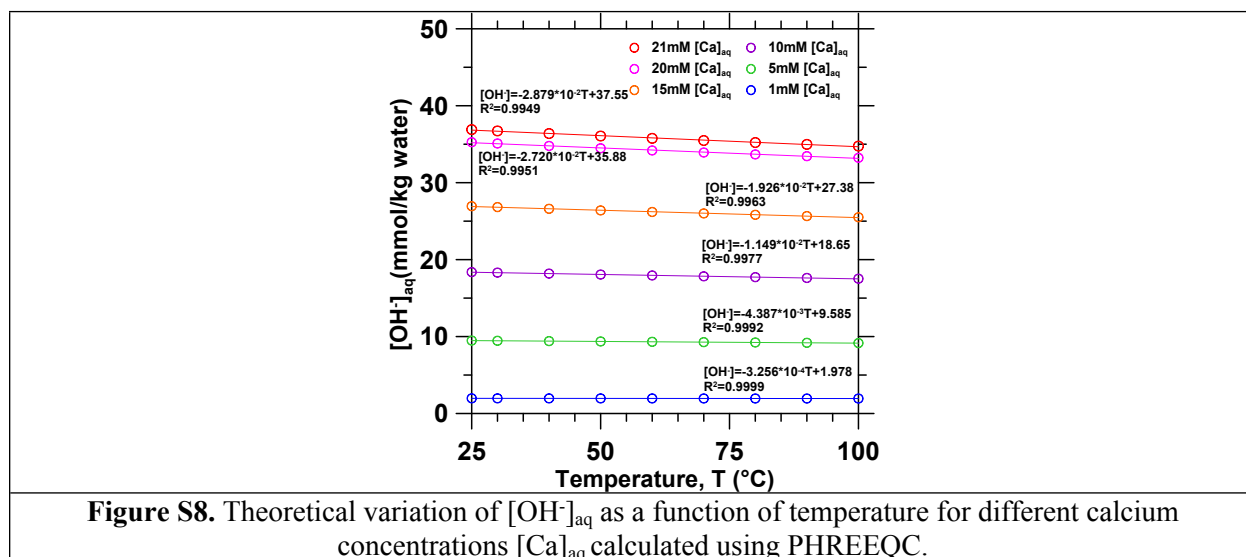

46

47 The calibration equation was set as  $[OH^-]_{aq} = \alpha T + \beta$ , where  $\beta$  is  $[OH^-]_{aq}$  at 25 °C as a function  
 48 of  $[Ca]_{aq}$  and  $\alpha$  describes the change in  $[OH^-]_{aq}$  with increasing temperature and  $[Ca]_{aq}$ . Figure S9  
 49 shows the linear regression used to calculate  $\alpha$  and  $\beta$ .

50

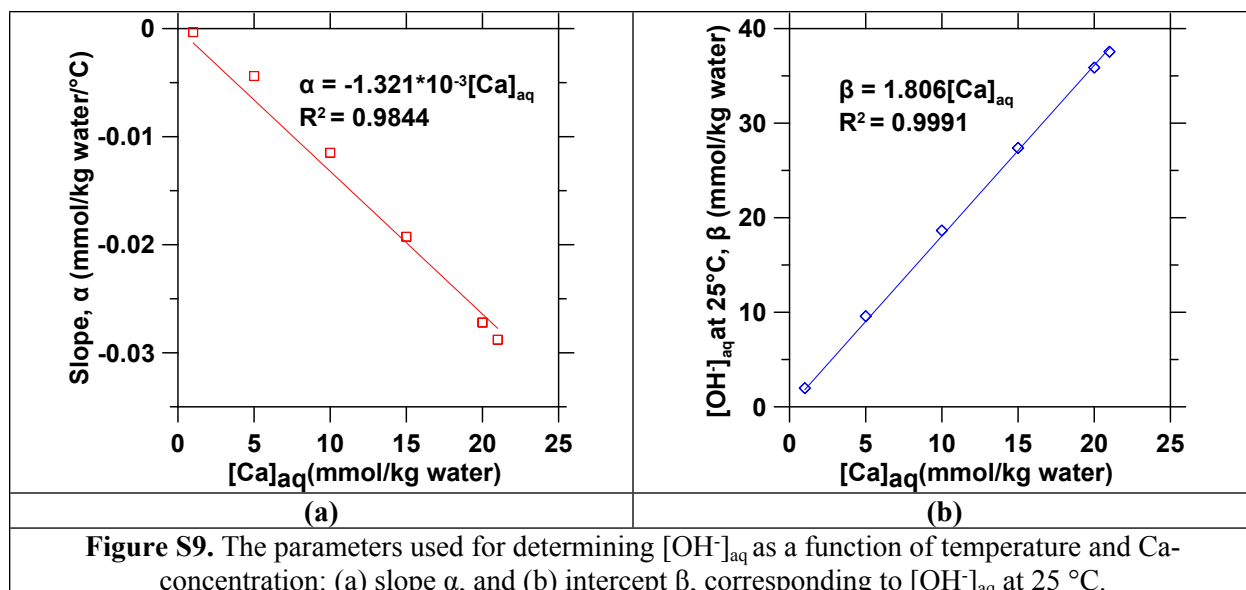

51

52 Hence, the change in  $[\text{OH}^-]_{\text{aq}}$  as a function of temperature and calcium concentration is given by

$$[\text{OH}]_{\text{aq}} = -1.321 \times 10^{-3} [\text{Ca}]_{\text{aq}} T + 1.806 [\text{Ca}]_{\text{aq}} \quad (\text{S9})$$

53

54 Finally, Equation S10 can be used to estimate  $[\text{Ca}]$  from conductivity measurements.

55

$$\sigma_{\text{calc}}([\text{Ca}]_{\text{aq}}, T) = 2[\text{Ca}]_{\text{aq}} \{ \lambda_{\text{Ca}}^{\circ}(T) - S_{\text{Ca}}(T) \times \Gamma([\text{Ca}]_{\text{aq}})^{1/2} \} + [\text{OH}]_{\text{aq}}([\text{Ca}]_{\text{aq}}, T) \quad (\text{S10})$$

56

### 57 Calculation of energy required to produce $\text{Ca}(\text{OH})_2$ using only waste heat

58 Concentrating the calcium-rich leachate solution to precipitate 1 kg of  $\text{Ca}(\text{OH})_2$  using only waste  
 59 heat would require the evaporation of 2466 L of water. First, the volume of water to be evaporated  
 60 to bring the solution to the saturation point of  $\text{Ca}(\text{OH})_2$  (13.8 mM at 100 °C) was calculated as  
 61  $\Delta V = V_i - V_f$ . Where  $V_i$  and  $V_f$  are the initial and final solution volume before and after evaporation,  
 62 respectively. Assuming the leachate solution has an initial volume  $V_i$  of 5400 L and a  $[\text{Ca}]$   
 63 concentration  $c_i$  of 10 mM (Figure S1), the solution volume after evaporation  $V_f$  can be calculated  
 64 according to  $V_f = V_i c_i / c_f$ , where  $c_f = 13.8 \text{ mM}$  corresponds to the saturation concentration of  
 65  $\text{Ca}(\text{OH})_2$  at 100 °C. Thus, 1487 L of water need to be evaporated. Second, precipitating 1 kg of  
 66  $\text{Ca}(\text{OH})_2$  from this saturated solution requires to evaporate 979 L of water, assuming that for every  
 67 liter of water evaporated from the saturated solution, 13.8 millimoles of  $\text{Ca}(\text{OH})_2$  will precipitate.  
 68 Thus, the total waste heat  $Q$  required to drive  $\text{Ca}(\text{OH})_2$  concentration and precipitation using only  
 69 waste heat is given by

$$Q = V \rho (c_p \Delta T + h_{fg}) \quad \text{S11}$$

70 where  $V$  (=2466 L) is the volume of water evaporated,  $\rho = 1 \text{ kg/L}$  and  $c_p = 4.18 \text{ kJ/(kg K)}$  are the  
 71 density and heat capacity of water, respectively,  $\Delta T = 75 \text{ K}$  is the temperature difference and  
 72  $h_{fg} = 2257 \text{ kJ/kg}$  is the heat of vaporization of water. Under these assumptions,  $Q = 6338 \text{ MJ}$  would  
 73 be necessary to precipitate 1 kg of  $\text{Ca}(\text{OH})_2$ . By contrast, the total amount of energy for RO  
 74 concentration and sub-boiling precipitation is 2.2 MJ of electricity and 677 MJ of waste heat,  
 75 respectively. It is one order of magnitude lower than what is required to precipitate  $\text{Ca}(\text{OH})_2$  using

76 waste heat only. Thus, the amount of waste heat of 5,000,000 GJ per year from a 10 MW<sub>e</sub> mid-sized  
77 power plant would enable the production of 7385 tons of Ca(OH)<sub>2</sub> per year when combined with  
78 RO concentration. By contrast, the production rate would be only 788 tons of Ca(OH)<sub>2</sub> per year if  
79 both concentration and precipitation are performed using only waste heat.
